# Supplementary material for: Efficacy and Safety of Dapagliflozin in Children With Inherited Proteinuric Kidney Disease: A Pilot Study
Source: PubMed Central journal article supplement — Kidney Int Rep. 2021 Dec 21;7(3):638–41. doi: 10.1016/j.ekir.2021.12.019 (PMC8897303; doi:10.1016/j.ekir.2021.12.019), 2021-12-21
Supplement: mmc1.pdf [file mmc1.pdf]

## **Supplementary Methods**

### **Study design and participants**

The study was an investigator-initiated, prospective pilot study. Eligible participants were children (aged 6-18 years) with proteinuria who were diagnosed with inherited kidney disease. All the participants were required to have been receiving a stable dose of an ACE inhibitor or ARB for at least 1 month before study drug administration, and estimated glomerular filtration rate (eGFR) were more than 60 mL/min per 1.73 m<sup>2</sup> calculated by the Schwartz formula<sup>1</sup>. Patients were excluded if they were with diabetes, orthotic proteinuria, untreated urinary tract infection, current treatment with systemic corticosteroids/calcineurin inhibitors/other immunosuppressant medications, or with evidence of hepatic disease. The full inclusion and exclusion criteria were described in Supplementary Table S1.

After enrolment, patients were prescribed dapagliflozin 5 mg per day (bodyweight ≤30 kg) or 10 mg per day (bodyweight > 30 kg) for 12 weeks. The efficacy of dapagliflozin in lowering the proteinuria was accessed by the percentage change in daily protein excretion over 12 weeks treatment relative to baseline; Safety was monitored throughout the study by assessing adverse events, laboratory data, vital sign measurements, physical examinations, and self-monitoring of blood glucose. Reported adverse events were recorded during the study. This pilot study was registered at [clinicaltrials.gov](https://clinicaltrials.gov) (NCT 04534270) and was approved by the ethical committee of Children's Hospital of Fudan University. All patients or their legal guardians provided written informed consent before study related procedure commenced.

### **Statistical Analysis**

All statistical analyses were conducted using SPSS 25.0. Descriptive statistics were expressed as mean (SD) or median (interquartile range). Paired t-tests or nonparametric equivalents were performed to analyse endpoints. P values < 0.05 were considered statistically significant.

## Supplementary References

1. Schwartz GJ, Munoz A, Schneider MF, et al. New equations to estimate GFR in children with CKD. *Journal of the American Society of Nephrology : JASN*. 2009;20(3):629-637.

## Supplementary Figure S1

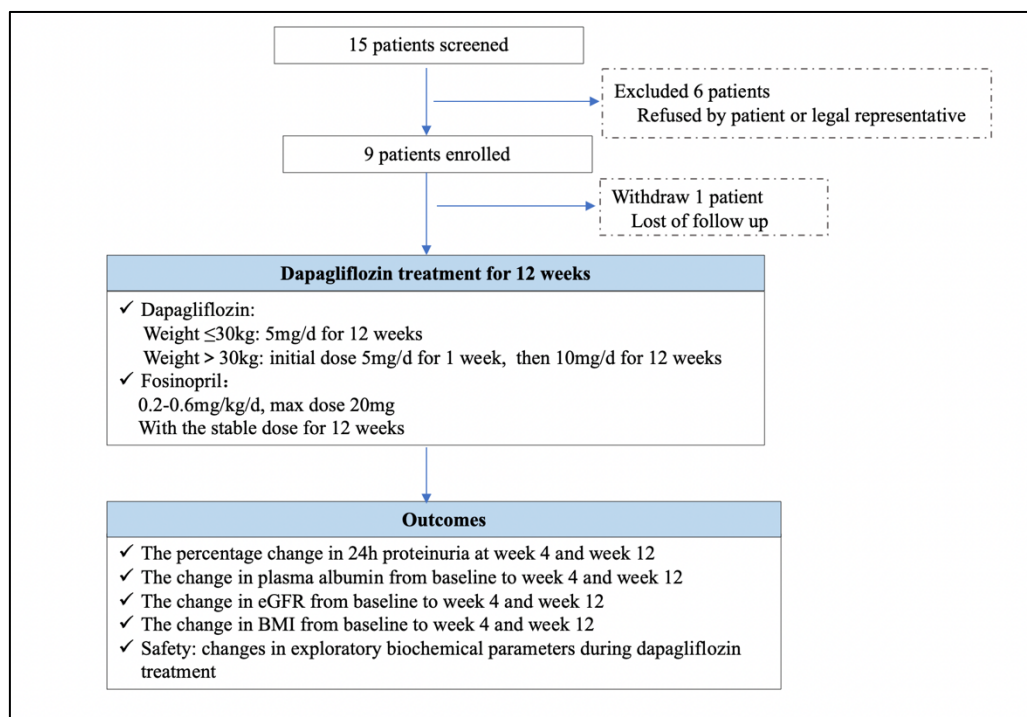

**Figure S1. Study flow chart**

## Supplementary Table S1.

**Table S1. The full inclusion and exclusion criteria**

### **Inclusion Criteria**

- ✓ Age 6 to 18 years
- ✓ Urinary protein excretion > 0.2g in a 24-hr urine collection
- ✓  $eGFR \geq 60 \text{ ml/min/1.73m}^2$  (estimated by Schwartz formula)
- ✓ On stable doses of ACE inhibitors for > 1 month
- ✓ Not receiving immunosuppressive therapy (including systemic corticosteroids, calcineurin inhibitors, or other immunosuppressant medications) within three months prior to enrolment
- ✓ No history of diabetes
- ✓ Willing to sign informed consent

### **Exclusion Criteria**

- ✓ Uncontrolled urinary tract infection at screening
- ✓ Blood pressure is less than the 5th percentile of the same gender, age, height
- ✓ At risk for dehydration or volume depletion
- ✓ History of organ transplantation, cancer, liver disease
- ✓ Bariatric surgery or other gastrointestinal surgeries that induce chronic malabsorption within the past 2 years
- ✓ With the evidence of liver disease: defined by serum levels of alanine transaminase, aspartate transaminase, or alkaline phosphatase >2 times the upper limit of normal during screening
- ✓ Participation in another therapeutic trial with an investigational drug within 30 days prior to informed consent
- ✓ History of noncompliance to medical regimens or unwillingness to comply with the study protocol

**Table S2. Changes in exploratory biochemical parameters during dapagliflozin treatment**

| Safety parameters                 | Baseline            | 12 weeks            | P value |
|-----------------------------------|---------------------|---------------------|---------|
| FBG, mean (SD), mmol/L            | 5.1 (0.3)           | 5.3 (0.4)           | 0.98    |
| Uric acid, mean (SD), $\mu$ mol/L | 420.1 (149.7)       | 322.1 (91.3)        | 0.45    |
| Hb, mean (SD), g/L                | 139.9 (12.2)        | 145.0 (13.3)        | 0.68    |
| Hct, median (IQR), %              | 39.3 (37.8 to 44.8) | 41.9 (39.8 to 45.8) | 0.17    |
| ALT, mean (SD), IU/L              | 13.0 (1.2)          | 12.4 (2.4)          | 0.57    |
| AST, mean (SD), IU/L              | 24.4 (4.1)          | 22.5 (3.8)          | 0.36    |
| TCH, mean (SD), IU/L              | 5.9 (1.7)           | 6.2 (1.3)           | 0.82    |
| TG, mean (SD), IU/L               | 2.2 (1.0)           | 1.7 (0.9)           | 0.62    |
| Potassium, mean (SD), mmol/L      | 4.5 (0.4)           | 4.4 (0.3)           | 0.88    |
| Sodium, mean (SD), mmol/L         | 139.0 (2.2)         | 138.6 (1.5)         | 0.78    |
| Calcium, mean (SD), mmol/L        | 2.3 (0.1)           | 2.4 (0.2)           | 0.59    |
| Phosphate, mean (SD), mmol/L      | 1.5 (0.2)           | 1.4 (0.2)           | 0.83    |

FBG, fasting blood glucose; Hb, haemoglobin; Hct, haematocrit ratio; ALT, aspartate aminotransferase; AST, alanine aminotransferase; TCH, total cholesterol; TG, triglycerides.
